# Supplementary material for: Benefits of the mbili-mbili maize-legume intercropping systems under subsurface water harvesting technology (SWRT) on sandy soils in the semi-arid Marange region of Zimbabwe
Source: Research Square preprint supplement (doi:10.21203/rs.3.rs-6291733/v1), 2025-05-06
Supplement: Supplementary file 1 [file df35bb4f8372476ab1277b51.docx]

**Table 2.**

|  | Maize | Maize +CP | Maize+CP+  BN | Maize+CP+  GN | Maize+beans | Maize+CP+  beans |
| --- | --- | --- | --- | --- | --- | --- |
| Production cost for maize/ha | 715 | 715 | 715 | 715 | 715 | 715 |
| Additional Cost for establishing legumes | 0 | 195 | 197 | 207 | 135 | 207 |
| Production cost for maize and legume /ha | 715 | 910 | 912 | 922 | 850 | 922 |
| Income from maize in (  USD, @$300/t | 1230.3 | 1140.9 | 1128 | 1114.2 | 1168.5 | 1119.3 |
| Sum of income for legumes ($) | 0 | 1256 | 324.4 | 511.14 | 4.8 | 637 |
| **Total income, maize + legumes ($)** | **1230.3** | **2396.9** | **1452.4** | **1625.34** | **1173.3** | **1756.3** |
| **Net Income ($)** | **515.3** | **1486.9** | **540.4** | **703.34** | **323.3** | **834.3** |

CP= Cowpea, BN=Bambara nuts, GN =ground nuts and beans = Nua45 bean variety
