# Supplementary material for: Benefits of the mbili-mbili maize-legume intercropping systems under subsurface water harvesting technology (SWRT) on sandy soils in the semi-arid Marange region of Zimbabwe
Source: Research Square preprint supplement (doi:10.21203/rs.3.rs-6291733/v1), 2025-05-06
Supplement: Supplementary file 2 [file e4d83c85c90d80af9e44442c.docx]

**Tables**

**Table 1.**

|  | Maize +CP | Maize+CP+BN | Maize+CP+GN | Maize+beans | Maize+CP+beans |
| --- | --- | --- | --- | --- | --- |
| Legume grain yields, kg ha-1 | 1570 CP | (CP=355, BN=40.4) | CP=549, GN=62.3 | beans=4.01 | CP=789.4,  beans=6.5 |
| Contributions of different legumes (%) to total legume yield | CP=100% | CP=88.6%  BN=11.4% | CP=88.6%  GN=11.4% | 100% | CP=99.2%  beans=0.8% |
| Average legume biomass yields (kg/ha) | 3685 | 1473 | 1795 | 62 | 1747 |
| Maize Equivalence Yield (MEY) Lsd=400 | 1230a | 1358a | 1625a | 1206a | 1330a |

CP= Cowpea, BN=Bambara nuts, GN =ground nuts and Beans = Nua45 Bean variety

Lsd =0.05
